# Supplementary material
Source: Springer Nature journal article supplement (https://www.springermedizin.de/resource/supplementary/12872_2011_378_MOESM2_ESM.pdf/9429814)

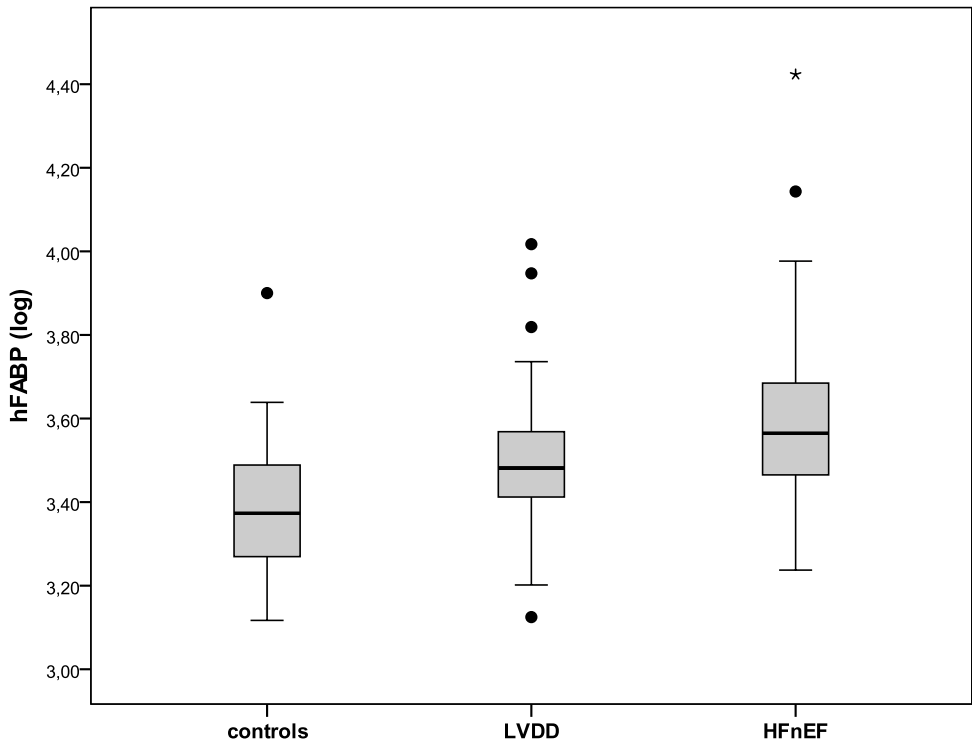

Supplement: MOESM2 [file 9429814]
